## Development and validation of a tool to stratify the treatment effect of low-dose aspirin in patients with cardiovascular disease: VISTA (Vascular Intervention Stratification Tool for Aspirin)

### Authors

Yekai Zhou BSc<sup>1\*</sup>, Joseph Edgar Blais BScPharm, PhD<sup>2\*</sup>, Esther Wai Yin Chan BPharm(Hons), PhD<sup>2,3</sup>, Tak-Wah Lam PhD<sup>1</sup>, Kai Hang Yiu MD, PhD<sup>4</sup>, Hung Fat Tse MD, PhD<sup>4</sup>, Celine SL Chui PhD<sup>3,5,6#</sup>, Ruibang Luo PhD<sup>1#</sup>

**\*Co-first authors**

**#Corresponding authors**

<sup>1</sup> Department of Computer Science, The University of Hong Kong, Hong Kong Special Administration Region, China

<sup>2</sup> Centre for Safe Medication Practice and Research, Department of Pharmacology and Pharmacy, The University of Hong Kong, Hong Kong Special Administrative Region, China

<sup>3</sup> Laboratory of Data Discovery for Health (D24H), Hong Kong Science Park, Hong Kong Science and Technology Park, Hong Kong Special Administrative Region, China

<sup>4</sup> Department of Medicine, School of Clinical Medicine, Li Ka Shing Faculty of Medicine, The University of Hong Kong, Hong Kong Special Administration Region, China

<sup>5</sup> School of Nursing, The University of Hong Kong, 5/F Academic Building, 3 Sassoon Road, Pokfulam, Hong Kong Special Administrative Region, China

<sup>6</sup> School of Public Health, The University of Hong Kong, Hong Kong Special Administrative Region, China

**Short Title:** Predicting low-dose aspirin treatment effect

### Corresponding Authors

Prof Celine Sze Ling Chui, 5/F Academic Building, 3 Sassoon Road, Pokfulam, Hong Kong Special Administration Region, China. Email: [cslchui@hku.hk](mailto:cslchui@hku.hk)

Prof Ruibang Luo, Rm 301 Chow Yei Ching Building, The University of Hong Kong, Pokfulam Road, Pokfulam, Hong Kong Special Administration Region, China. Email: [rbluo@cs.hku.hk](mailto:rbluo@cs.hku.hk)

**Manuscript word count: 3911**

## Abstract

### *Background*

Aspirin resistance, as determined by measuring platelet aggregation function, has been investigated as a proxy outcome for clinical treatment failure with low-dose aspirin (occurrence of cardiovascular events despite regular aspirin intake). However, among adults with cardiovascular disease (CVD), there is no method to predict aspirin treatment failure using routinely available clinical data. We aimed to develop and internally validate the Vascular Intervention Stratification Tool for Aspirin (VISTA), a model that predicts inter-individual variability in clinical response to low-dose aspirin.

### *Methods*

We used electronic health records of the Hong Kong Hospital Authority to identify derivation (n=48,743) and validation (n=322,731) cohorts consisting of individuals diagnosed with CVD between January 1, 2015 to December 31, 2018. The composite outcome of recurrent CVD event included the diagnosis of coronary heart disease, ischemic stroke, and peripheral artery disease after low-dose aspirin initiation ( $\leq 100$  mg). Cox proportional hazards regression with the least absolute shrinkage and selection operator regularization was used to identify the most strongly associated and relevant risk factors for aspirin treatment failure. One-year hazard ratio (HR) was estimated across different risk categories for aspirin treated vs. untreated individuals.

### *Results*

The derivation cohort included 1,623 individuals who initiated low-dose aspirin after their CVD diagnosis. Among 109 variables available, six were selected as model inputs: atrial fibrillation, dyslipidemia, hyperglycemia, polypharmacy, neutrophilia, and elevated serum creatine kinase. In the model validation cohort, we identified 22,192 individuals who initiated low-dose aspirin and 3,747 individuals without aspirin, other antiplatelets, or anticoagulants. Results of the model validation demonstrated a strong graded association between the number of VISTA risk factors and the one-year risk of CVD. Compared to untreated individuals, low-dose aspirin use with no VISTA risk factors had the lowest HR for CVD (0.68, 95% CI of 0.57 to 0.81). For low-dose aspirin user with 1-2 VISTA risk factors, HRs was 0.87 (0.81 to 0.93). The presence of 3-6 VISTA risk factors was associated with aspirin treatment failure (HR 0.99; 95% CI of 0.88 to 1.12), which occurred in approximately 20% of patients in our validation cohort.

### *Conclusions*

VISTA can predict the heterogeneity of low-dose aspirin's treatment effect against recurrent CVD. VISTA could be used to stratify patients based on six readily available risk factors and inform patients and clinicians about the potential benefits of aspirin therapy and the potential for alternate antiplatelet treatments.

**Keywords:** Low-dose aspirin, aspirin treatment failure, aspirin resistance, stratified medicine, heterogeneity of treatment effect, secondary prevention, risk prediction model, electronic health records

## Clinical perspective

### *What is new?*

- We developed VISTA (Vascular Intervention Stratification Tool for Aspirin), the first tool that enables the stratification of low-dose aspirin treatment effect for the secondary prevention of cardiovascular disease (CVD). By utilizing six easily accessible clinical risk factors (atrial fibrillation, dyslipidemia, hyperglycemia, polypharmacy, neutrophilia, and elevated serum creatine kinase), VISTA allows for the assessment of aspirin suitability before prescription.
- VISTA can differentiate patients who are likely to benefit significantly from aspirin treatment (0 risk factors, hazard ratio [HR] of 0.68) from those who may experience aspirin treatment failure (3-6 risk factors, HR of 0.99).

### *What are the clinical implications?*

- Estimated from a high-quality contemporary validation cohort, there are approximately 20% of patients with CVD who may experience aspirin treatment failure.
- By utilizing VISTA, healthcare providers can personalize aspirin treatment, optimizing its effectiveness and minimizing the potential for treatment failure. This tool empowers clinicians to make more accurate and tailored decisions in prescribing low-dose aspirin for secondary prevention of cardiovascular disease, ultimately leading to improved patient outcomes.

## 1 Introduction

2

3 Cardiovascular diseases (CVD), such as coronary heart disease and stroke, are the leading  
4 cause of death worldwide, resulting in an estimated 18.6 million fatalities in 2019.<sup>1,2</sup> Aspirin,  
5 or acetylsalicylic acid, has long been recognized as a crucial intervention to improve CVD  
6 outcomes due to its antiplatelet properties, particularly in secondary prevention of CVD.<sup>3,4</sup>  
7 However, the occurrence of occlusive CVD events despite regular aspirin intake, a  
8 phenomenon known as aspirin treatment failure, poses a significant clinical challenge.<sup>5-10</sup>  
9 Identifying patients who may have limited benefit from CVD prevention with aspirin but are  
10 exposed to an elevated risk of major organ bleeding is essential for appropriate aspirin  
11 prescription and selection of suitable antiplatelet treatments for CVD prevention.<sup>11</sup>  
12 Although methods exist to indirectly query aspirin effectiveness via platelet aggregation  
13 function tests, there are currently no solutions available to predict aspirin treatment failure  
14 in clinical settings.<sup>5,12-15</sup>

15

16 Existing methods for evaluating aspirin effectiveness involve assays that test a laboratory  
17 phenomenon called aspirin resistance.<sup>5</sup> These assays, including the platelet function  
18 analyzer (PFA-100), whole blood aggregometry (WBA), and VerifyNow aspirin assay  
19 (VerifyNow), quantify and compare the platelet aggregation function before and after the  
20 administration of aspirin.<sup>5,12-15</sup> However, these assays have limitations when it comes to  
21 aspirin prescriptions. First, they serve only as risk indicators, similar to age and lipid levels;  
22 they cannot measure the treatment effect of aspirin.<sup>16,17</sup> Second, these assays utilize  
23 different techniques, resulting in poor agreement even among the same group of  
24 patients.<sup>18-25</sup> This lack of consistency adds to the difficulty for clinicians in selecting the most  
25 appropriate assay. Third, these assays are not endorsed by clinical guidelines and are not  
26 typically available in general hospital settings, limiting their use as routine tests for aspirin  
27 prescription reference.<sup>26,27</sup> Therefore, there is an urgent need for a method based on easily  
28 accessible patient characteristics that can directly estimate the treatment effect of aspirin in  
29 CVD prevention.

30

31 In this study, we present the development and validation of the Vascular Intervention  
32 Stratification Tool for Aspirin (VISTA), which was designed to stratify the treatment effect of  
33 aspirin for the prevention of recurrent CVD events. VISTA is based on six easily accessible  
34 patient characteristics that can be assessed prior to aspirin prescription in actual clinical  
35 settings. We conducted a large, comprehensive cohort study in Hong Kong, encompassing a  
36 wide range of potential risk factors. By employing advanced big data approaches, we  
37 analyzed this extensive dataset to identify the most significant risk factors contributing to  
38 the variation in aspirin treatment effects. The validity of the identified risk factors was then  
39 confirmed in a separate validation cohort, which demonstrated their accuracy in stratifying  
40 the treatment effects of aspirin. Our method provides a straightforward estimation of  
41 aspirin's treatment effect, serving as a tool to assess its potential benefits for individual  
42 patients. Leveraging VISTA's capabilities, clinicians gain early access to this information,  
43 enabling informed decisions about aspirin therapy suitability.

44

## 45 Methods

46 *Data source*

47 Two contemporary cohorts were identified for model derivation and validation from the  
48 electronic health records of the Hong Kong Hospital Authority (HA) with rigorous inclusion  
49 criteria (Figure 1). The HA is a statutory body and the largest public healthcare provider of  
50 Hong Kong. It provides government subsidized primary, secondary, and tertiary care for all  
51 residents who want it, capturing over 70% of all hospitalizations in Hong Kong.<sup>28</sup> Previous  
52 studies demonstrated the high validity of the data source, with a positive predictive value of  
53 85% for myocardial infarction (MI) and 91% for stroke.<sup>29</sup> Because patients are provided  
54 outpatient medications at very low out-of-pocket cost, dispensing records for low-dose  
55 aspirin are recorded in the HA database. This makes it suitable to investigate the chronic  
56 effects of low-dose aspirin, which may not be feasible in many other health systems where  
57 patients purchase aspirin as an over-the-counter medication without prescription or  
58 recording.<sup>30</sup>

59

#### 60 Study cohorts and eligibility criteria

61 We included patients who 1) had their first CVD diagnosis recorded between 1 January 2015  
62 and 31 December 2018, 2) did not have an aspirin prescription dispensed before the index  
63 CVD event, and 3) had a prescription record for low-dose ( $\leq 100$ mg) aspirin daily until the  
64 end of study follow-up, or did not have any prescription record for aspirin at any dose until  
65 the end point of their study (as the control group to compare with the treated patients to  
66 calculate the treatment effect of aspirin). The cohort entry date was the date of their first  
67 diagnosis of CVD in any inpatient or outpatient setting. Patients were followed until the  
68 earliest occurrence of the composite recurrent CVD outcome, date of registered death, one  
69 year after their index CVD diagnosis, or the study end date (31 December 2019). We did not  
70 include patients with CVD diagnosis within one year before the study end date to ensure the  
71 patients would have sufficient exposure to aspirin therapy. Daily aspirin users whose most  
72 frequently visited healthcare facility within the study period was on Hong Kong Island were  
73 categorized as the Hong Kong Island cohort for model derivation. Patients with their most  
74 frequently visited healthcare facility within the study period was on Kowloon and New  
75 Territories were categorized as the Kowloon and New Territories cohort for model  
76 validation. The daily aspirin users were in the treatment group and the non-aspirin users in  
77 the untreated (control) group.

78

#### 79 *Exposure, outcomes and risk factor variables*

80 The included patients had a CVD diagnosis (coronary heart disease, ischemic stroke, and  
81 peripheral artery disease) between January 1, 2015, and December 31, 2018. Patients were  
82 not prescribed low-dose ( $\leq 100$  mg) aspirin before the CVD event. The control group  
83 patients were not treated with low-dose aspirin before their censored date. The control  
84 group patients received sufficient daily low-dose aspirin treatment from the date of CVD  
85 event to their censored date.

86

87 The outcome was the diagnosis of CVD defined by the International Classification of  
88 Diseases, Ninth Revision, Clinical Modification (ICD-9-CM) codes. The outcome was a  
89 composite of coronary heart disease, ischaemic or haemorrhagic stroke, and peripheral  
90 artery disease (Supplementary Table 1).

91

92 We compiled an extensive list of over 100 variables to ensure the selection of  
93 representative risk factors. The list encompassed clinical laboratory tests, disease and

94 medication history, family history of disease, demographic factors, and healthcare utilization  
95 (Table 2). Diagnoses and procedures were defined by ICD-9-CM codes (Supplementary Table  
96 2), and medication history was defined by the British National Formulary (BNF) sections  
97 (Supplementary Table 3).

98

### 99 *Statistical analysis*

100 A robust feature selection pipeline was applied to identify the risk variables for model  
101 derivation.<sup>31,32</sup> Multivariate imputation with chained equations (MICE) was used to generate  
102 one imputed dataset to replace the missing values of clinical laboratory tests.<sup>33</sup> MICE is a  
103 principled method for dealing with missing data and is extremely reliable on high-  
104 dimensional datasets with various missing patterns.<sup>34</sup> For better statistical reliability and  
105 clinical utility, risk variables with missing rates below 20% (e.g., clinical laboratory tests) and  
106 an event rate above 1% (e.g., disease and medication history) were passed for feature  
107 selection. We employed a Cox proportional hazards model (CPH) with the least absolute  
108 shrinkage and selection operator (LASSO) regularization to shortlist statistically significant (p  
109 value<0.05) risk variables.<sup>35,36</sup> CPH is the most widely used multivariate statistical model for  
110 survival analysis.<sup>37,38</sup> Its regression coefficients can be interpreted as hazard ratios which can  
111 be easily understood by clinicians for better decision-making. LASSO is a robust feature  
112 selection method. It selects the most representative but independent set of risk variables,  
113 which is reliable when downstream manual prioritization is required. The final list of risk  
114 variables was also determined based on current clinical evidence to ensure the final set of  
115 risk variables are comprehensive and relevant to CVD prognosis. The identified continuous  
116 risk variables were converted to categorical form based on clinical diagnosis criteria. Each  
117 risk variable was weighted as one point, and the risk category was defined as the total  
118 number of risk factors for each patient.

119

120 Patients in the validation cohort were assigned risk categories based on the identified risk  
121 variables. One-year CVD risk was calculated for patients within different risk categories in  
122 the treatment and control groups respectively using the Kaplan-Meier method.<sup>39</sup> The  
123 treatment effect and the confidence interval across different risk categories were calculated  
124 as the coefficient in CPH, which was trained on the composite of treatment and control  
125 group patients with treatment as a covariate in each risk category. All analyses were  
126 conducted using Python (version 3.9.1), with its add-on package lifelines.<sup>40</sup> This study report  
127 is in accordance with the TRIPOD statement.<sup>41</sup> Ethical approval for this study was granted by  
128 the Institutional Review Board of The University of Hong Kong/HA Hong Kong West Cluster  
129 (UW24-124).

130

## 131 **Results**

### 132 *Study cohorts*

133 For the derivation cohort, we initially identified 48,743 patients aged 18 or above with lipid  
134 test records and diagnosis of CVD at hospitals in the Hong Kong West Cluster. We excluded  
135 39,262 patients whose first CVD event occurred before January 1, 2015, or after December  
136 31, 2018. We excluded 3,169 patients with low dose aspirin treatment before their first CVD.  
137 We excluded 4,546 patients with no daily aspirin treatment after CVD. We excluded 140  
138 patients with anticoagulant or other antiplatelet treatments before or after CVD. We  
139 excluded 3 patients with the first CVD diagnosis of hemorrhagic stroke. Overall, 1,623

140 patients (selected out of 48,743 patients) who took aspirin daily were included in the Hong  
141 Kong Island cohort for model derivation.

142

143 For the validation cohort, we initially identified a cohort of 322,731 patients aged 35 or  
144 above with blood pressure records and diagnosis of CVD by the Hospital Authority. Similar  
145 exclusion criteria were applied to the validation cohort. A total of 245,188 patients were  
146 excluded who had their first CVD event before January 1, 2015 or after December 31, 2018.  
147 A total of 28,902 of patients were excluded who had low dose aspirin treatment before their  
148 first CVD. A total of 8,372 patients were excluded who had received aspirin treatment after  
149 CVD, but not daily. A total of 580 patients were excluded because of immediate CVD death.  
150 To ensure no overlap with the derivation cohort, we excluded 6,845 patients with most  
151 frequently visited healthcare utilization on the Hong Kong Island. We excluded 1,619  
152 patients with anticoagulant or other antiplatelet treatments before or after CVD. We  
153 excluded 5,286 patients with the first CVD diagnosis of hemorrhagic stroke. Overall, 25,939  
154 patients (selected out of 322,731 patients) were included in the Kowloon and New  
155 Territories cohort for model validation; 22,192 daily aspirin users were assigned to the  
156 treatment group and 3,747 non aspirin users were assigned to the control group.

157

#### 158 *Baseline characteristics*

159 The baseline characteristics were similar across the cohorts and subgroups, to ensure the  
160 reliability of our selection criteria and support the subsequent model derivation and  
161 validation (Table 1). The median age at the cohort entry date was 67 to 75, and 35–48% of  
162 the patients were female. A considerable proportion of the patients had comorbidities: 12-  
163 23% with dyslipidemia, 30-40% with hypertension, 19-20% with diabetes, 3-10% with atrial  
164 fibrillation, 3-5% with chronic kidney disease, and 6-7% with congestive heart failure.  
165 Regarding medication history, 18-21% of patients had received statin therapy, 15-22% of  
166 patients had taken antidiabetic drugs, and 42-65% of patients were on antihypertensive  
167 drugs. The median number of concurrent medications was 6-7.

168

#### 169 *Model development*

170 The complete list of all available variables and the details of the feature selection process  
171 are shown in Table 2. There were initially 109 risk variables under consideration. We  
172 excluded 38 of them with a high missing rate (>20%) or low event rate (<1%) from  
173 subsequent LASSO regression for better statistical reliability and clinical utility. The LASSO  
174 regression on the remaining variables identified 7 statistically significant ( $p$  value < 0.05)  
175 variables. We shortlisted 4 of them based on clinical evidence. We replaced the use of  
176 antiplatelet drugs with fasting glucose level as a measure of diabetic inclination due to the  
177 higher data completeness of the latter. We added atrial fibrillation to the final list  
178 considering its established role in suboptimal aspirin effectiveness.<sup>42,43</sup> We translated the  
179 selected numerical variables, namely neutrophil count, creatine kinase, glucose levels, and  
180 concurrent medication, into categorical variables based on specific diagnostic criteria.  
181 Neutrophil count was categorized as neutrophilia (neutrophil count >  $7.5 \times 10^9/L$ ), creatine  
182 kinase was categorized as elevated CK (defined as CK > 400 IU/L), glucose levels were  
183 categorized as hyperglycemia (glucose > 7 mmol/L), and concurrent medication was  
184 categorized as polypharmacy (concurrent medication > 4).

185

186 The identified risk factors encompassed a comprehensive spectrum of direct and indirect  
187 causes that contributed aspirin suboptimal effects, which were supported by the literature.  
188 First, while aspirin is more effective in atherosclerotic CVD, its effectiveness in other types of  
189 CVD may be limited.<sup>44</sup> Aspirin has limited efficacy for stroke prevention in patients with  
190 atrial fibrillation.<sup>43</sup> Neutrophilia may serve as an indicator of inflammation signaling arteritis  
191 which compromise the efficacy of aspirin.<sup>44,45</sup> Elevated CK, an indicator of muscle damage, is  
192 a possible sign of cardiomyopathy or myonecrosis, which could potentially impact the  
193 response to aspirin treatment.<sup>46,47</sup> Specific comorbidities and prevalent drug use may also  
194 affect the treatment effect of aspirin. Polypharmacy can lead to drug interactions that  
195 interfere with the effect of aspirin. Hyperglycemia and dyslipidemia may hinder the  
196 intended antiplatelet effects of aspirin by increasing the production of prostaglandin F2-like  
197 compounds.<sup>48-50</sup> The final list of the 6 risk factors was then utilized in the CPH. The  
198 parameter estimates for each of the 6 predictor variables showed statistical significance and  
199 were of similar magnitude (Table 3).

200

201 To facilitate practical implementation, we adopted a pragmatic approach by categorizing the  
202 suboptimal aspirin treatment effect based on the number of risk factors present in an  
203 individual. This risk stratification strategy allows for a straightforward assessment of the  
204 likelihood and extent of suboptimal aspirin response based on the number and nature of  
205 identified risk factors.

206

#### 207 *Model validation*

208 We compared the outcomes in the treatment and control group across different risk  
209 categories with different number of risk factors in the validation cohort (Figure 2). For the  
210 ease of clinical use and model stability, we defined 3 risk categories regarding the total  
211 number of 0, 1-2, and 3-6 risk factors (out of 6) for aspirin treatment effect stratification.  
212 Around 80% of patients (79.7% in the treatment group and 78.7% in the control group) were  
213 in the risk categories with less than three risk factors. The results showed that patients had  
214 similar baseline one-year CVD recurrence risk regardless of the risk category (from 43.5%  
215 with 0 risk factors to 52.4% with 3-6 risk factors in the control group). In contrast, the  
216 recurrence risk with aspirin treatment showed strong graded association with the risk  
217 categories (from 34.0% with 0 risk factors to 54.5% with 3-6 risk factors in the aspirin  
218 treatment group). The stable baseline risk and the graded risk after treatment showed the  
219 robustness of the risk factors that we identified. As the number of risk factors increased,  
220 there was a gradual approaching tendency in the CVD risk between the treatment and  
221 control group. This indicated that aspirin treatment might be more effective in individuals  
222 with fewer risk factors than those with multiple risk factors.

223

224 The HR of aspirin treatment, estimated based on both groups, exhibited a similar trend  
225 (Table 4). Specifically, patients with no risk factors (14.2% of patients) had an aspirin  
226 treatment HR of 0.68. This suggested that aspirin treatment significantly reduced the risk of  
227 CVD events in this low-risk subgroup. For patients with 1-2 risk factors, which constituted  
228 64.8% of the cohort, the aspirin treatment HR is 0.87. Although the effect size was slightly  
229 attenuated compared to the no-risk factor group, these individuals still benefited from  
230 aspirin treatment as indicated by the reduced HR. In contrast, the remaining 21.0% of  
231 patients with 3-6 risk factors exhibited an aspirin treatment HR of 0.99. This group of high-



232 risk patients may be referred to as had aspirin treatment failure, since aspirin therapy did  
233 not provide an additional protective effect against CVD events.

234

### 235 *Website design*

236 A website employed VISTA at [www.bio8.cs.hku.hk/vista.html](http://www.bio8.cs.hku.hk/vista.html) (Supplementary Information 1)  
237 was deployed for demonstration, and to enhance utility and clinician-patient discussions.

238

### 239 **Discussion**

240 Our study represents the first investigation, to the best of our knowledge, into the impact of  
241 patient characteristics on the effectiveness of low-dose aspirin for preventing recurrent CVD  
242 events in secondary prevention. We conducted rigorous statistical testing on a large pool of  
243 variables and identified six relevant risk factors, which encompass potential mechanisms  
244 underlying suboptimal treatment effects of aspirin. The results of our model validation  
245 further demonstrated the strong performance of our model in stratifying aspirin treatment  
246 effects. By leveraging VISTA's capabilities, clinicians gain early access to the potential  
247 benefits of aspirin therapy as a treatment option for each patient, allowing them to make  
248 informed decisions regarding its suitability. The tool enables clinicians to assess a patient's  
249 risk of treatment failure and proactively adjust the medication regimen by considering  
250 alternative therapeutic approaches. For instance, if a patient exhibits a high risk of  
251 treatment failure, the clinician can opt to rely on other medications, such as setting lower  
252 targets for blood pressure and LDL cholesterol with a higher intensity of antihypertensive  
253 and lipid-lowering agents. By optimizing the combination of medications based on individual  
254 patient characteristics, this decision support tool has the potential to enhance treatment  
255 efficacy and improve outcomes in the secondary prevention of CVD.

256

257 Optimizing the prescription of low-dose aspirin for CVD prevention requires a  
258 comprehensive evaluation of both the potential bleeding risk and the treatment effect.  
259 While a study has attempted on this objective, it only predicted the bleeding risk, without  
260 assessing the treatment benefit.<sup>51</sup> In scenarios where the predicted treatment benefit is  
261 unknown, clinicians may only rely on the bleeding risk as a reference. If the bleeding risk is  
262 not high, aspirin may be considered as a viable option, even though the benefit remains  
263 uncertain. Conversely, if the estimated benefit from aspirin is modest, regardless of how low  
264 the bleeding risk is, it is advisable to avoid prescribing aspirin and instead prioritize other  
265 medications to achieve the targeted treatment objective. Our study addresses this limitation  
266 by directly assessing the treatment effect of aspirin, offering a more comprehensive  
267 perspective. Moreover, the bleeding risk study identified 20 risk factors that were  
268 associated with the bleeding risk. However, only one of them overlapped with our identified  
269 risk factors (diabetes), while the other 19 of them were not associated with treatment  
270 failure. This disparity suggests that the treatment benefit and bleeding risk operate through  
271 distinct mechanisms and systems. It emphasizes the significance of our study in prompting  
272 clinicians to consider the benefit-risk scenario differently when prescribing aspirin.

273

274 Aspirin treatment failure has long been recognized as important consideration in clinical  
275 practice. Existing methods for assessing aspirin's antiplatelet effects rely on specific  
276 laboratory tests, such as PFA-100, WBA, and VerifyNow, which measure individual platelet  
277 function to predict the effectiveness of aspirin. Several case studies have shown that aspirin  
278 resistance, as indicated by these assays, is associated with a higher rate of CVD events.<sup>16,52</sup>

279 However, these tests are not readily available in general hospital settings and have modest  
280 correlation and agreement. For instance, in a study of 201 patients with stable coronary  
281 artery disease receiving >80mg/day of aspirin, the prevalence of aspirin resistance varied  
282 greatly: 7% from VerifyNow, 18% from WBA, and 60% from PFA-100.<sup>18</sup> Also, they do not  
283 directly predict the effectiveness of aspirin in preventing CVD, limiting their practical  
284 usefulness for clinicians' reference. In contrast, our study proposes a practical method that  
285 utilizes easily accessible variables to predict the treatment effect of aspirin on CVD  
286 prevention. According to the validation results, approximately 80% of patients are expected  
287 to experience a considerable treatment effect from aspirin, with hazard ratios ranging from  
288 0.67 to 0.83. However, approximately 20% of patients may have treatment failure (HR close  
289 to 1.00) from aspirin if two or more risk factors are present. The findings from our research  
290 provide valuable guidance for clinicians in the decision-making process of prescribing aspirin.  
291 By offering a straightforward estimation of aspirin's treatment effect, our method can be  
292 used as a tool to assess the potential benefits of aspirin as a treatment option for each  
293 patient.

294  
295 Our work introduced a novel lens to investigate treatment recommendation methods in the  
296 era of big data. Traditional approaches to evaluate treatment effects rely on randomized  
297 controlled trials (RCTs). RCTs face practical constraints, cost considerations, and data  
298 management complexities, which often lead to the collection of a limited number of patient  
299 characteristics. While RCTs are reliable in yielding population-level outcomes, stratifying  
300 individual benefits based on these limited covariates is challenging. In our research, we  
301 demonstrated the potential of high-quality retrospective cohort studies with a  
302 comprehensive set of covariates in treatment effect stratification. We utilized a robust  
303 feature selection process to identify key risk factors in aspirin efficacy variation and applied  
304 rigorous validation to estimate the variation of the treatment effects across various risk  
305 groups. In the era of big data and with advances in data curation, there is an opportunity to  
306 develop more robust treatment effect stratification that complements the population-level  
307 results obtained from RCTs. Our approach has proved to be robust in addressing this task  
308 and can be extended to analyze the efficacy of various therapies. By leveraging the vast  
309 amount of available data, we can gain valuable insights into individual treatment responses  
310 and enhance personalized medicine approaches.

311  
312 There are limitations in our study. First, both our derivation and validation cohorts were  
313 developed using data from Hong Kong. Although Hong Kong is a multi-ethnic city, its  
314 population is predominantly Chinese. Consequently, the generalizability of our model's  
315 performance to other ethnicities and regions may be uncertain. Future research should aim  
316 to apply our model to validation cohorts comprising diverse ethnic populations to assess its  
317 performance across different racial groups. Second, our estimation of treatment effects  
318 across risk groups was based on a retrospective cohort study design. This introduces the  
319 possibility of selection bias in the selection of the treatment and control groups. To further  
320 validate our model, it would be beneficial to conduct more rigorous investigations, such as  
321 prospective clinical studies that incorporate the collection of the identified key risk factors.  
322 This independent validation of each risk factor and evaluation of the performance of risk  
323 group treatment stratification would provide stronger evidence for the effectiveness and  
324 reliability of our model.

325

326 **Conclusions**

327 The variability in aspirin treatment effects poses a significant challenge in optimizing  
328 therapeutic outcomes for patients with CVD. VISTA can be helpful in the secondary  
329 prevention of CVD which can identify patients who may be at risk of treatment failure thus  
330 help clinicians with treatment planning. We identified six key risk factors, history of atrial  
331 fibrillation, dyslipidemia, hyperglycemia, polypharmacy, neutrophilia, and elevated CK, that  
332 contribute to the variation in aspirin treatment effects. The big-data approach employed in  
333 our study also holds promise across various therapeutic areas beyond aspirin therapy. This  
334 research represents a significant step towards advancing personalized medicine in aspirin  
335 therapy, ultimately enhancing therapeutic effectiveness and improving CVD prevention on  
336 an individualized basis.

337  
338 **Acknowledgements**

339 Nil.

340

341 **Sources of funding**

342 Nil.

343

344 **Disclosures**

345 EWYC reports honorarium from Hospital Authority; and grants from Research Grants Council  
346 (RGC, Hong Kong), Research Fund Secretariat of the Food and Health Bureau, National  
347 Natural Science Fund of China, Wellcome Trust, Bayer, Bristol-Myers Squibb, Pfizer, Janssen,  
348 Amgen, Takeda, and Narcotics Division of the Security Bureau of the Hong Kong Special  
349 Administrative Region, outside the submitted work. CSLC has received grants from the Food  
350 and Health Bureau of the Hong Kong Government, Hong Kong Research Grant Council, Hong  
351 Kong Innovation and Technology Commission, Pfizer, IQVIA, MSD, and Amgen; and personal  
352 fees from PrimeVigilance; outside the submitted work. RL has received grants from Hong  
353 Kong Research Grant Council, Hong Kong Innovation and Technology Commission; and  
354 research donations from Oxford Nanopore Technologies, outside the submitted work. All  
355 other authors declare no competing interests.

356

357 **References**

- 358 1. Roth GA, Mensah GA, Johnson CO, et al. Global Burden of Cardiovascular Diseases  
359 and Risk Factors, 1990-2019: Update From the GBD 2019 Study. *J Am Coll Cardiol* 2020;  
360 **76**(25): 2982-3021.
- 361 2. GBD 2019 Diseases and Injuries Collaborators. Global burden of 369 diseases and  
362 injuries in 204 countries and territories, 1990-2019: a systematic analysis for the Global  
363 Burden of Disease Study 2019. *Lancet* 2020; **396**(10258): 1204-22.
- 364 3. Collaborative overview of randomised trials of antiplatelet therapy--I: Prevention of  
365 death, myocardial infarction, and stroke by prolonged antiplatelet therapy in various  
366 categories of patients. Antiplatelet Trialists' Collaboration. *BMJ* 1994; **308**(6921): 81-106.
- 367 4. Antithrombotic Trialists C. Collaborative meta-analysis of randomised trials of  
368 antiplatelet therapy for prevention of death, myocardial infarction, and stroke in high risk  
369 patients. *BMJ* 2002; **324**(7329): 71-86.
- 370 5. Bhatt DL, Topol EJ. Scientific and therapeutic advances in antiplatelet therapy. *Nat*  
371 *Rev Drug Discov* 2003; **2**(1): 15-28.

- 372 6. Neergaard-Petersen S, Ajjan R, Hvas AM, et al. Fibrin clot structure and platelet  
373 aggregation in patients with aspirin treatment failure. *PLoS One* 2013; **8**(8): e71150.
- 374 7. Chu JW, Wong CK, Chambers J, Wout JV, Herbison P, Tang EW. Aspirin resistance  
375 determined from a bed-side test in patients suspected to have acute coronary syndrome  
376 portends a worse 6 months outcome. *QJM* 2010; **103**(6): 405-12.
- 377 8. Airee A, Draper HM, Finks SW. Aspirin resistance: disparities and clinical implications.  
378 *Pharmacotherapy* 2008; **28**(8): 999-1018.
- 379 9. Patrono C, Garcia Rodriguez LA, Landolfi R, Baigent C. Low-dose aspirin for the  
380 prevention of atherothrombosis. *N Engl J Med* 2005; **353**(22): 2373-83.
- 381 10. Grundmann K, Jaschonek K, Kleine B, Dichgans J, Topka H. Aspirin non-responder  
382 status in patients with recurrent cerebral ischemic attacks. *J Neurol* 2003; **250**(1): 63-6.
- 383 11. Antithrombotic Trialists C, Baigent C, Blackwell L, et al. Aspirin in the primary and  
384 secondary prevention of vascular disease: collaborative meta-analysis of individual  
385 participant data from randomised trials. *Lancet* 2009; **373**(9678): 1849-60.
- 386 12. Harrison P. Progress in the assessment of platelet function. *Br J Haematol* 2000;  
387 **111**(3): 733-44.
- 388 13. Kundu SK, Heilmann EJ, Sio R, Garcia C, Davidson RM, Ostgaard RA. Description of an  
389 in vitro platelet function analyzer--PFA-100. *Semin Thromb Hemost* 1995; **21** Suppl 2: 106-12.
- 390 14. Rand ML, Leung R, Packham MA. Platelet function assays. *Transfus Apher Sci* 2003;  
391 **28**(3): 307-17.
- 392 15. Patrono C. Aspirin resistance: definition, mechanisms and clinical read-outs. *J*  
393 *Thromb Haemost* 2003; **1**(8): 1710-3.
- 394 16. Gum PA, Kottke-Marchant K, Welsh PA, White J, Topol EJ. A prospective, blinded  
395 determination of the natural history of aspirin resistance among stable patients with  
396 cardiovascular disease. *J Am Coll Cardiol* 2003; **41**(6): 961-5.
- 397 17. Chen WH, Cheng X, Lee PY, et al. Aspirin resistance and adverse clinical events in  
398 patients with coronary artery disease. *Am J Med* 2007; **120**(7): 631-5.
- 399 18. Lordkipanidze M, Pharand C, Schampaert E, Turgeon J, Palisaitis DA, Diodati JG. A  
400 comparison of six major platelet function tests to determine the prevalence of aspirin  
401 resistance in patients with stable coronary artery disease. *Eur Heart J* 2007; **28**(14): 1702-8.
- 402 19. Breet NJ, van Werkum JW, Bouman HJ, Kelder JC, Ten Berg JM, Hackeng CM. High  
403 on-aspirin platelet reactivity as measured with aggregation-based, cyclooxygenase-1  
404 inhibition sensitive platelet function tests is associated with the occurrence of  
405 atherothrombotic events. *J Thromb Haemost* 2010; **8**(10): 2140-8.
- 406 20. Grove EL, Hvas AM, Johnsen HL, et al. A comparison of platelet function tests and  
407 thromboxane metabolites to evaluate aspirin response in healthy individuals and patients  
408 with coronary artery disease. *Thromb Haemost* 2010; **103**(6): 1245-53.
- 409 21. Cattaneo M. Laboratory detection of 'aspirin resistance': what test should we use (if  
410 any)? *Eur Heart J* 2007; **28**(14): 1673-5.
- 411 22. Lev EI. Aspirin resistance transient laboratory finding or important clinical entity? *J*  
412 *Am Coll Cardiol* 2009; **53**(8): 678-80.
- 413 23. Muir AR, McMullin MF, Patterson C, McKeown PP. Assessment of aspirin resistance  
414 varies on a temporal basis in patients with ischaemic heart disease. *Heart* 2009; **95**(15):  
415 1225-9.
- 416 24. Santilli F, Rocca B, De Cristofaro R, et al. Platelet cyclooxygenase inhibition by low-  
417 dose aspirin is not reflected consistently by platelet function assays: implications for aspirin  
418 "resistance". *J Am Coll Cardiol* 2009; **53**(8): 667-77.

- 419 25. Shen H, Herzog W, Drolet M, et al. Aspirin Resistance in healthy drug-naive men  
420 versus women (from the Heredity and Phenotype Intervention Heart Study). *Am J Cardiol*  
421 2009; **104**(4): 606-12.
- 422 26. Michelson AD, Cattaneo M, Eikelboom JW, et al. Aspirin resistance: position paper of  
423 the Working Group on Aspirin Resistance. *J Thromb Haemost* 2005; **3**(6): 1309-11.
- 424 27. Wang TH, Bhatt DL, Topol EJ. Aspirin and clopidogrel resistance: an emerging clinical  
425 entity. *Eur Heart J* 2006; **27**(6): 647-54.
- 426 28. Census and Statistics Department. Hong Kong Special Administrative Region.  
427 Thematic Household Survey Report No. 68. 2018.  
428 [https://www.censtatd.gov.hk/en/data/stat\\_report/product/B1130201/att/B11302682019X](https://www.censtatd.gov.hk/en/data/stat_report/product/B1130201/att/B11302682019X)  
429 XXXB0100.pdf.
- 430 29. Wong AY, Root A, Douglas IJ, et al. Cardiovascular outcomes associated with use of  
431 clarithromycin: population based study. *bmj* 2016; **352**.
- 432 30. Shami JJP, Yan VKC, Wei Y, et al. Low-dose aspirin does not lower the risk of  
433 colorectal cancer in patients with type 2 diabetes taking metformin. *J Intern Med* 2023;  
434 **293**(3): 371-83.
- 435 31. Zhou Y, Lin CJ, Yu Q, et al. Development and validation of risk prediction model for  
436 recurrent cardiovascular events among Chinese: the Personalized CARdiovascular Disease  
437 risk Assessment for Chinese model. *European Heart Journal - Digital Health* 2024.
- 438 32. Zhou Y, Lin CJX, Yu Q, et al. Primary Prevention Cardiovascular Disease Risk  
439 Prediction Model for Contemporary Chinese (1° P-CARDIAC): Model Derivation and  
440 Validation Using a Hybrid Statistical and Machine-Learning Approach.
- 441 33. van Buuren S, Groothuis-Oudshoorn K. mice: Multivariate Imputation by Chained  
442 Equations in R. *Journal of Statistical Software* 2011; **45**(3): 1 - 67.
- 443 34. Azur MJ, Stuart EA, Frangakis C, Leaf PJ. Multiple imputation by chained equations:  
444 what is it and how does it work? *Int J Methods Psychiatr Res* 2011; **20**(1): 40-9.
- 445 35. Tibshirani R. Regression Shrinkage and Selection Via the Lasso. *Journal of the Royal*  
446 *Statistical Society: Series B (Methodological)* 1996; **58**(1): 267-88.
- 447 36. Cox DR. Regression Models and Life-Tables. *Journal of the Royal Statistical Society:*  
448 *Series B (Methodological)* 1972; **34**(2): 187-202.
- 449 37. Deo SV, Deo V, Sundaram V. Survival analysis—part 2: Cox proportional hazards  
450 model. *Indian journal of thoracic and cardiovascular surgery* 2021; **37**(2): 229-33.
- 451 38. Harrell FE. Regression modeling strategies: with applications to linear models,  
452 logistic regression, and survival analysis: Springer; 2001.
- 453 39. Kaplan EL, Meier P. Nonparametric Estimation from Incomplete Observations.  
454 *Journal of the American Statistical Association* 1958; **53**: 457-81.
- 455 40. Davidson-Pilon C. lifelines: survival analysis in Python. *Journal of Open Source*  
456 *Software* 2019; **4**(40): 1317.
- 457 41. Transparent reporting of a multivariable prediction model for individual prognosis or  
458 diagnosis (TRIPOD): The TRIPODstatement. The UK EQUATOR Centre.
- 459 42. Warfarin versus aspirin for prevention of thromboembolism in atrial fibrillation:  
460 Stroke Prevention in Atrial Fibrillation II Study. *Lancet* 1994; **343**(8899): 687-91.
- 461 43. Lip GY. The role of aspirin for stroke prevention in atrial fibrillation. *Nat Rev Cardiol*  
462 2011; **8**(10): 602-6.
- 463 44. Sanderson S, Emery J, Baglin T, Kinmonth AL. Narrative review: aspirin resistance and  
464 its clinical implications. *Ann Intern Med* 2005; **142**(5): 370-80.

- 465 45. Arruda-Olson AM, Reeder GS, Bell MR, Weston SA, Roger VL. Neutrophilia predicts  
466 death and heart failure after myocardial infarction: a community-based study. *Circ*  
467 *Cardiovasc Qual Outcomes* 2009; **2**(6): 656-62.
- 468 46. Savonitto S, Granger CB, Ardissino D, et al. The prognostic value of creatine kinase  
469 elevations extends across the whole spectrum of acute coronary syndromes. *J Am Coll*  
470 *Cardiol* 2002; **39**(1): 22-9.
- 471 47. Chen W-H, Lee P-Y, Ng W, Tse H-F, Lau C-P. Aspirin resistance is associated with a  
472 high incidence of myonecrosis after non-urgent percutaneous coronary intervention despite  
473 clopidogrel pretreatment. *Journal of the American College of Cardiology* 2004; **43**(6): 1122-6.
- 474 48. Cambria-Kiely JA, Gandhi PJ. Possible mechanisms of aspirin resistance. *J Thromb*  
475 *Thrombolysis* 2002; **13**(1): 49-56.
- 476 49. Davi G, Ciabattini G, Consoli A, et al. In vivo formation of 8-iso-prostaglandin f2alpha  
477 and platelet activation in diabetes mellitus: effects of improved metabolic control and  
478 vitamin E supplementation. *Circulation* 1999; **99**(2): 224-9.
- 479 50. Parker WAE, Sagar R, Kurdee Z, et al. A randomised controlled trial to assess the  
480 antithrombotic effects of aspirin in type 1 diabetes: role of dosing and glycaemic control.  
481 *Cardiovasc Diabetol* 2021; **20**(1): 238.
- 482 51. Selak V, Jackson R, Poppe K, et al. Predicting Bleeding Risk to Guide Aspirin Use for  
483 the Primary Prevention of Cardiovascular Disease: A Cohort Study. *Ann Intern Med* 2019;  
484 **170**(6): 357-68.
- 485 52. Eikelboom JW, Hirsh J, Weitz JI, Johnston M, Yi Q, Yusuf S. Aspirin-resistant  
486 thromboxane biosynthesis and the risk of myocardial infarction, stroke, or cardiovascular  
487 death in patients at high risk for cardiovascular events. *Circulation* 2002; **105**(14): 1650-5.
- 488  
489  
490  
491  
492  
493  
494  
495  
496  
497  
498  
499  
500  
501  
502  
503  
504  
505  
506  
507  
508  
509  
510

**Table 1. Baseline characteristics of the derivation and validation cohorts**

---

|                                  | Derivation cohort:<br>Hong Kong Island<br>(n=1,623) |               | Validation cohort: Kowloon and New Territories |               |                            |               |
|----------------------------------|-----------------------------------------------------|---------------|------------------------------------------------|---------------|----------------------------|---------------|
|                                  |                                                     |               | Treatment group<br>(n=22,192)                  |               | Control group<br>(n=3,747) |               |
| <b>Demographic factors</b>       |                                                     |               |                                                |               |                            |               |
| Age                              | 67                                                  | (58-78)       | 68                                             | (59-79)       | 75                         | (63-85)       |
| Female sex                       | 561                                                 | (35%)         | 8,404                                          | (38%)         | 1,807                      | (48%)         |
| Male sex                         | 1,062                                               | (65%)         | 13,788                                         | (62%)         | 1,940                      | (52%)         |
| <b>Disease history</b>           |                                                     |               |                                                |               |                            |               |
| Atrial fibrillation              | 74                                                  | (5%)          | 708                                            | (3%)          | 390                        | (10%)         |
| Dyslipidemia                     | 215                                                 | (13%)         | 5,180                                          | (23%)         | 431                        | (12%)         |
| Diabetes                         | 315                                                 | (19%)         | 4,404                                          | (20%)         | 725                        | (19%)         |
| Hypertension                     | 492                                                 | (30%)         | 7,694                                          | (35%)         | 1,488                      | (40%)         |
| Chronic kidney disease           | 43                                                  | (3%)          | 563                                            | (3%)          | 179                        | (5%)          |
| Congestive heart failure         | 109                                                 | (7%)          | 1,379                                          | (6%)          | 274                        | (7%)          |
| <b>Medication history</b>        |                                                     |               |                                                |               |                            |               |
| Statins                          | 288                                                 | (18%)         | 4,638                                          | (21%)         | 784                        | (21%)         |
| Antidiabetic drugs               | 242                                                 | (15%)         | 4,487                                          | (20%)         | 841                        | (22%)         |
| Antihypertensive                 | 680                                                 | (42%)         | 12,556                                         | (57%)         | 2453                       | (65%)         |
| Count of medication              | 6                                                   | (4-8)         | 6                                              | (5-9)         | 7                          | (5-10)        |
| <b>Clinical laboratory tests</b> |                                                     |               |                                                |               |                            |               |
| Neutrophil, 10 <sup>9</sup> /L   | 4.8                                                 | (3.6-6.7, 0%) | 5.4                                            | (4.0-7.7, 1%) | 6.2                        | (4.3-9.8, 1%) |
| Creatine kinase, IU/L            | 140                                                 | (83-319, 14%) | 136                                            | (82-304, 10%) | 112                        | (63-219, 11%) |
| Glucose (fasting), mmol/L        | 5.7                                                 | (5.2-6.9, 1%) | 5.8                                            | (5.2-7.0, 1%) | 5.7                        | (5.1-7.0, 9%) |

All data in n (%), median (interquartile range), or median (interquartile range, proportion of missing data).

511  
512  
513  
514  
515  
516  
517  
518  
519  
520  
521  
522  
523  
524  
525  
526  
527  
528  
529  
530  
531  
532  
533  
534

**Table 2. Summary of included 109 variables assessed in the model derivation cohort**

| Categories (number of variables)      | Risk variables                                                                                                                                                                                                                                                                                                                                                                                                                                                                                                                                                                                                                                                                                                                                                                                                                                     |
|---------------------------------------|----------------------------------------------------------------------------------------------------------------------------------------------------------------------------------------------------------------------------------------------------------------------------------------------------------------------------------------------------------------------------------------------------------------------------------------------------------------------------------------------------------------------------------------------------------------------------------------------------------------------------------------------------------------------------------------------------------------------------------------------------------------------------------------------------------------------------------------------------|
| <b>Demographic factors (2)</b>        | age, sex                                                                                                                                                                                                                                                                                                                                                                                                                                                                                                                                                                                                                                                                                                                                                                                                                                           |
| <b>Family history of disease (2)</b>  | diabetes, <del>cardiovascular disease</del>                                                                                                                                                                                                                                                                                                                                                                                                                                                                                                                                                                                                                                                                                                                                                                                                        |
| <b>Healthcare utilization (3)</b>     | outpatient visits per year*, accident and emergency visits per year, inpatient visits per year                                                                                                                                                                                                                                                                                                                                                                                                                                                                                                                                                                                                                                                                                                                                                     |
| <b>Clinical laboratory tests (39)</b> | neutrophil*^, creatine kinase (total)*^, monocyte*, glucose (fasting)^, aspartate transaminase, alanine aminotransferase, low-density lipoprotein cholesterol, hemoglobin A1c, prothrombin time, potassium (serum), estimated glomerular filtration rate, triglycerides, basophil, albumin, international normalized ratio, bilirubin (total), total cholesterol, lymphocyte, creatinine (serum), platelet, red blood cell, high-density lipoprotein cholesterol, body mass index, calcium (serum), white blood cell, alkaline phosphatase, sodium (serum), eosinophil, hemoglobin, <del>thyroid stimulating hormone, diastolic blood pressure, systolic blood pressure, erythrocyte sedimentation rate, C-reactive protein, bicarbonate (serum), blood pH, free thyroxine, arterial partial pressure of oxygen, troponin-I</del>                  |
| <b>Medication history (24)</b>        | antidiabetic drugs*, count of medication*^, statins, antihypertensive drugs, non-steroidal anti-inflammatory drugs, corticosteroids, proton-pump inhibitors, H2-receptor antagonists, nicotine replacement therapy, antiarrhythmic drugs, antithyroid drugs, psychotropic drugs, nitrates, thyroid hormones, fibrates, other non-statin lipid-modifying drugs, <del>cardiac glycosides, omega-3 fatty acids, PCSK9 inhibitors, cholesterol absorption inhibitors, bile acid sequestrants, testosterone, oestrogen, niacin</del>                                                                                                                                                                                                                                                                                                                    |
| <b>Disease history (39)</b>           | dyslipidemia*^, pacemaker implantation, atrial fibrillation^, hypertension, diabetes, congestive heart failure, thyroid disease, arrhythmia and conduction disorders, obesity, oxygen therapy/ventilator/intubation, asthma, injury and poisoning, severe mental illness, dementia, liver disease, chronic obstructive pulmonary disease, cancer, renal disease, chronic kidney disease, dialysis, <del>Huntington's disease, erectile dysfunction, systemic lupus erythematosus, Parkinson's disease, nephrotic syndrome, Creutzfeldt-Jakob disease, Down's syndrome, defibrillator insertion, smoker, alcohol user, heart transplantation, rheumatoid arthritis, hypothyroidism, cardioversion, muscle pain or myopathy or rhabdomyolysis, migraine, cardiac wall/valve/shunt replacement/repairment, cardiomyopathy, major organ bleeding</del> |

Strikethrough: excluded from LASSO regression due to high missing rate (>20%) or low event rate (<1%).

\*Significant variables (p-value<0.05) in LASSO regression. ^Selected variables for final modeling. PCSK9 = Proprotein convertase subtilisin/kexin type 9.

535  
536  
537  
538  
539  
540  
541  
542  
543

**Table 3. Multivariate stratification model for aspirin treatment effect**



| Variable            | HR (95%CI)       | p-value | points |
|---------------------|------------------|---------|--------|
| Atrial fibrillation | 1.73 (1.33-2.24) | <0.05   | 1      |
| Dyslipidemia        | 1.19 (1.00-1.42) | 0.06    | 1      |
| Hyperglycemia       | 1.19 (1.03-1.38) | <0.05   | 1      |
| Polypharmacy        | 1.23 (1.08-1.41) | <0.05   | 1      |
| Neutrophilia        | 1.45 (1.23-1.71) | <0.05   | 1      |
| Elevated CK         | 1.70 (1.46-1.99) | <0.05   | 1      |

HR = hazard ratio. CI = confidence interval. Hyperglycemia = glucose > 7 (mmol/L).

Polypharmacy = concurrent medication > 4. Neutrophilia = neutrophil > 7.5 (10<sup>9</sup>/L).

Elevated CK = creatine kinase > 400 (IU/L).

544  
545  
546  
547  
548  
549  
550  
551  
552  
553  
554  
555  
556  
557  
558  
559  
560  
561  
562  
563  
564  
565  
566  
567  
568  
569  
570  
571  
572  
573  
574  
575  
576  
577  
578  
579  
580  
581  
582

**Table 4. Treatment effect stratification for low-dose aspirin compared to no aspirin treatment after the**

**diagnosis of CVD in the validation cohort (n=25,939)**

| Number of VISTA risk factors | One-year aspirin treatment effect (HR) | Number of patients | Proportion of patients |
|------------------------------|----------------------------------------|--------------------|------------------------|
| 0                            | 0.677 (0.569-0.806)                    | 4,403              | 14.2%                  |
| 1-2                          | 0.866 (0.810-0.927)                    | 16,799             | 64.8%                  |
| 3-6                          | 0.991 (0.876-1.121)                    | 5459               | 21.0%                  |

583  
584  
585  
586  
587  
588  
589  
590  
591  
592  
593  
594  
595  
596  
597  
598  
599  
600  
601  
602  
603  
604  
605  
606  
607  
608  
609  
610  
611  
612  
613  
614  
615  
616  
617  
618  
619  
620  
621  
622

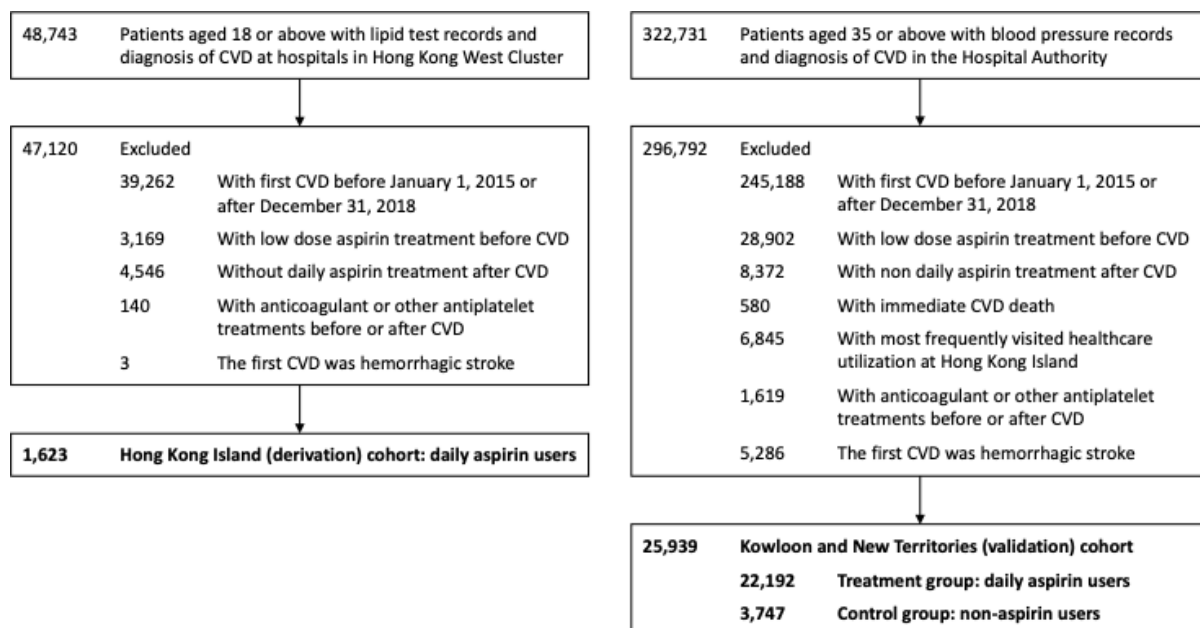

**Figure 1. Selection of patients.** Hong Kong West Cluster is a part of Hong Kong Island. CVD = cardiovascular diseases.

623  
624  
625  
626  
627  
628  
629  
630  
631  
632  
633  
634  
635  
636  
637  
638  
639  
640  
641  
642  
643  
644  
645  
646  
647  
648  
649  
650  
651  
652  
653  
654  
655  
656  
657

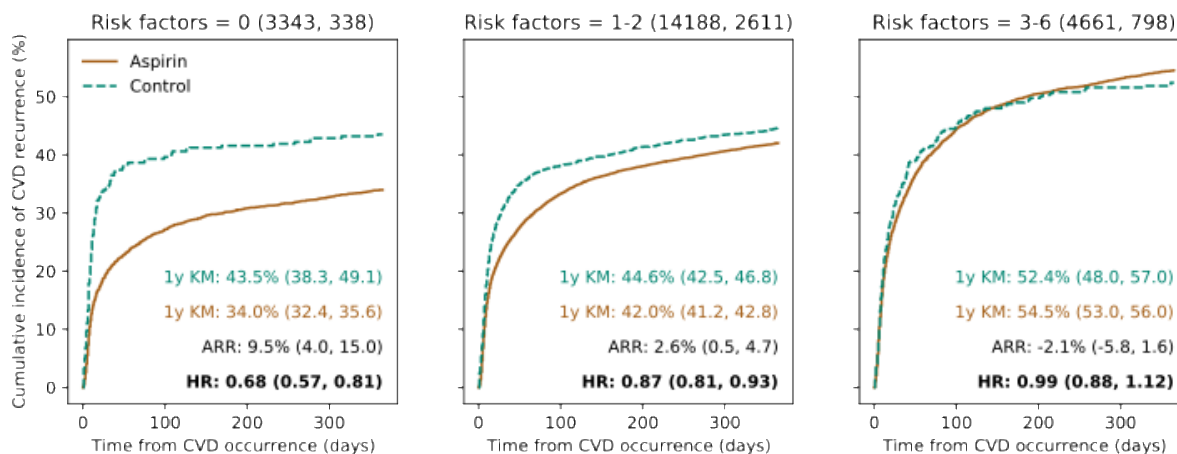

658  
659  
660  
661  
662  
663

**Figure 2. Outcomes by risk categories and treatment in the validation cohort.** Kaplan-Meier curves stratified by different risk categories and treatment groups (aspirin versus control). Number of patients in aspirin group and control group in each risk category were shown after each subtitle (aspirin, control). One year Kaplan-Meier CVD recurrence probability (1y KM) in the two groups, the corresponding absolute risk reduction (ARR), and the hazard ratio (HR) with 95% confidence interval for aspirin versus control groups are shown.
